# Supplementary material for: WNT3 Is a Biomarker Capable of Predicting the Definitive Endoderm Differentiation Potential of hESCs
Source: PubMed Central journal article supplement — Stem Cell Reports. 2013 Jun 4;1(1):46–52. doi: 10.1016/j.stemcr.2013.03.003 (PMC3757741; doi:10.1016/j.stemcr.2013.03.003), 2013-06-04
Supplement: mmc1.pdf [file mmc1.pdf]

## Stem Cell Reports, Volume 1

### Supplemental Information

#### **WNT3 Is a Biomarker Capable of Predicting the Definitive Endoderm Differentiation Potential of hESCs**

Wei Jiang, Donghui Zhang, Nenad Bursac, and Yi Zhang

#### **Inventory of Supplemental Information**

Figure S1, related to Figure 1. **Relationship between gene expression and efficiency of endoderm differentiation.**

Figure S2, related to Figure 2. **Change in WNT3 levels does not affect hESC maintenance, but affects neuroectoderm and mesendoderm differentiation.**

Figure S3, related to Figure 3.

Table S1, **Primers for quantitative expression analysis of RT-PCR.**

Supplemental Experimental Procedures.

A

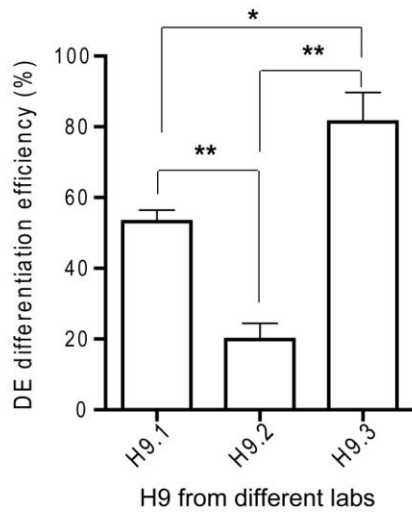

B

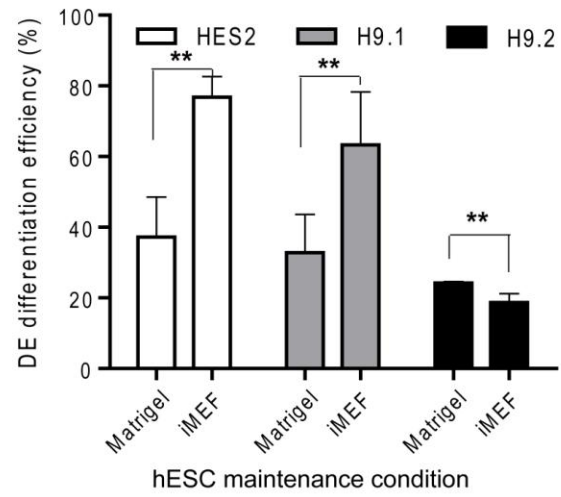

C

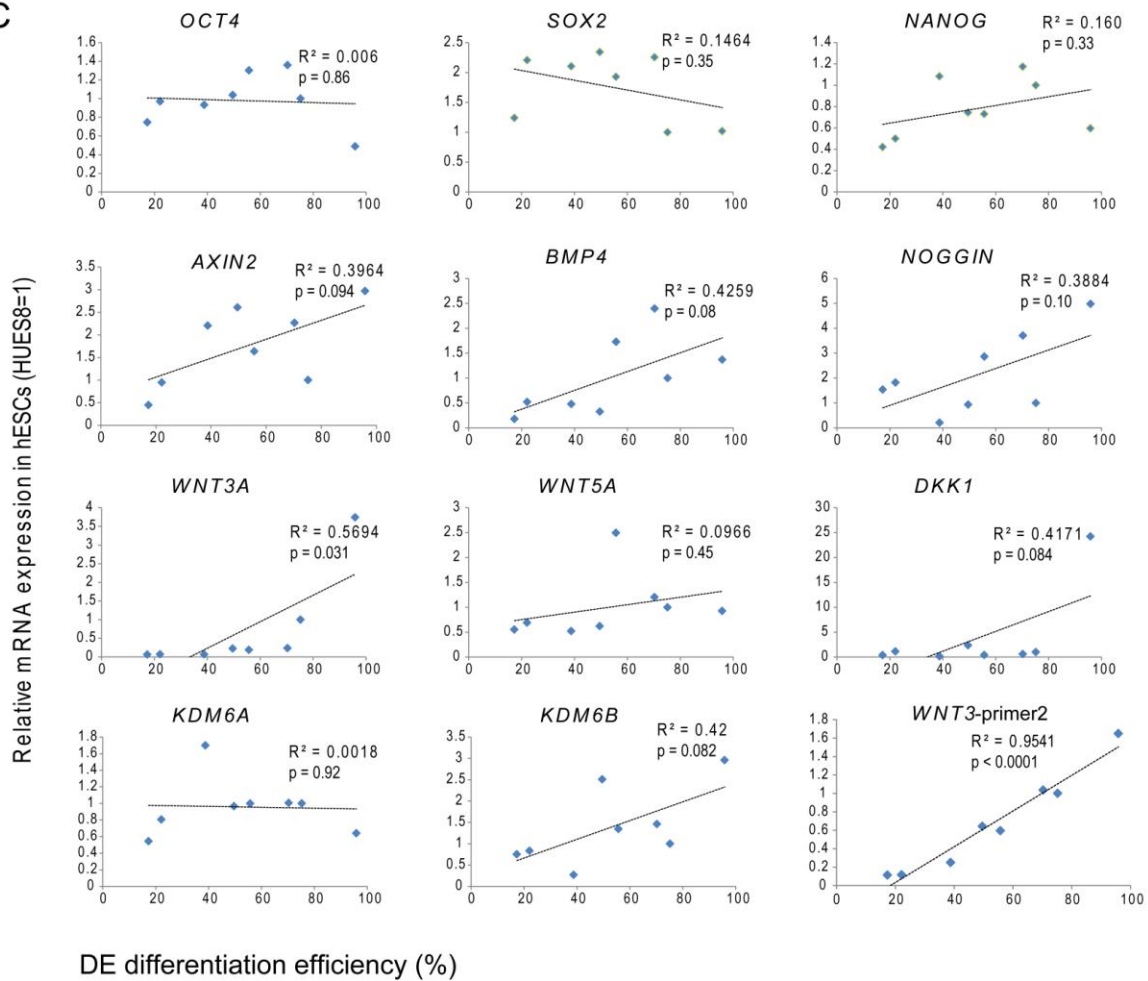

**Figure S1** (related to Figure 1). Relationship between gene expression and efficiency of endoderm differentiation

- (A) Three H9 sub-lines maintained in different laboratories showed different definitive endoderm (DE) differentiation efficiency. H9.1, H9.2, and H9.3 are respectively from the Zhang lab, Bursac Lab, and Deng lab (Peking University). All of them are cultured with mitomycin C- inactivated mouse embryonic fibroblasts (iMEF). Data was shown by value with standard deviation from three biological replicates.
- (B) The same cell line maintained under different conditions showed different definitive endoderm differentiation efficiency. HES2 and H9.1, but not H9.2, showed better differentiation efficiency when cultured with iMEF. Data was shown by value with standard deviation from three biological replicates. The p value by student *t* test was shown as \*:  $p < 0.05$ ; \*\*:  $p < 0.01$ .
- (C) RT-qPCR analysis demonstrates that in contrast to *WNT3* (Figure 1B, and last panel with another primer pair), the expression levels of many genes including pluripotent transcription factors (*OCT4*, *SOX2*, *NANOG*), signaling factors (*WNT3A*, *WNT5A*, *DKK1*, *AXIN2*, *BMP4*, *NOGGIN*) and epigenetic factors (*KDM6A*, *KDM6B*), showed poor correlation with endoderm differentiation potential.

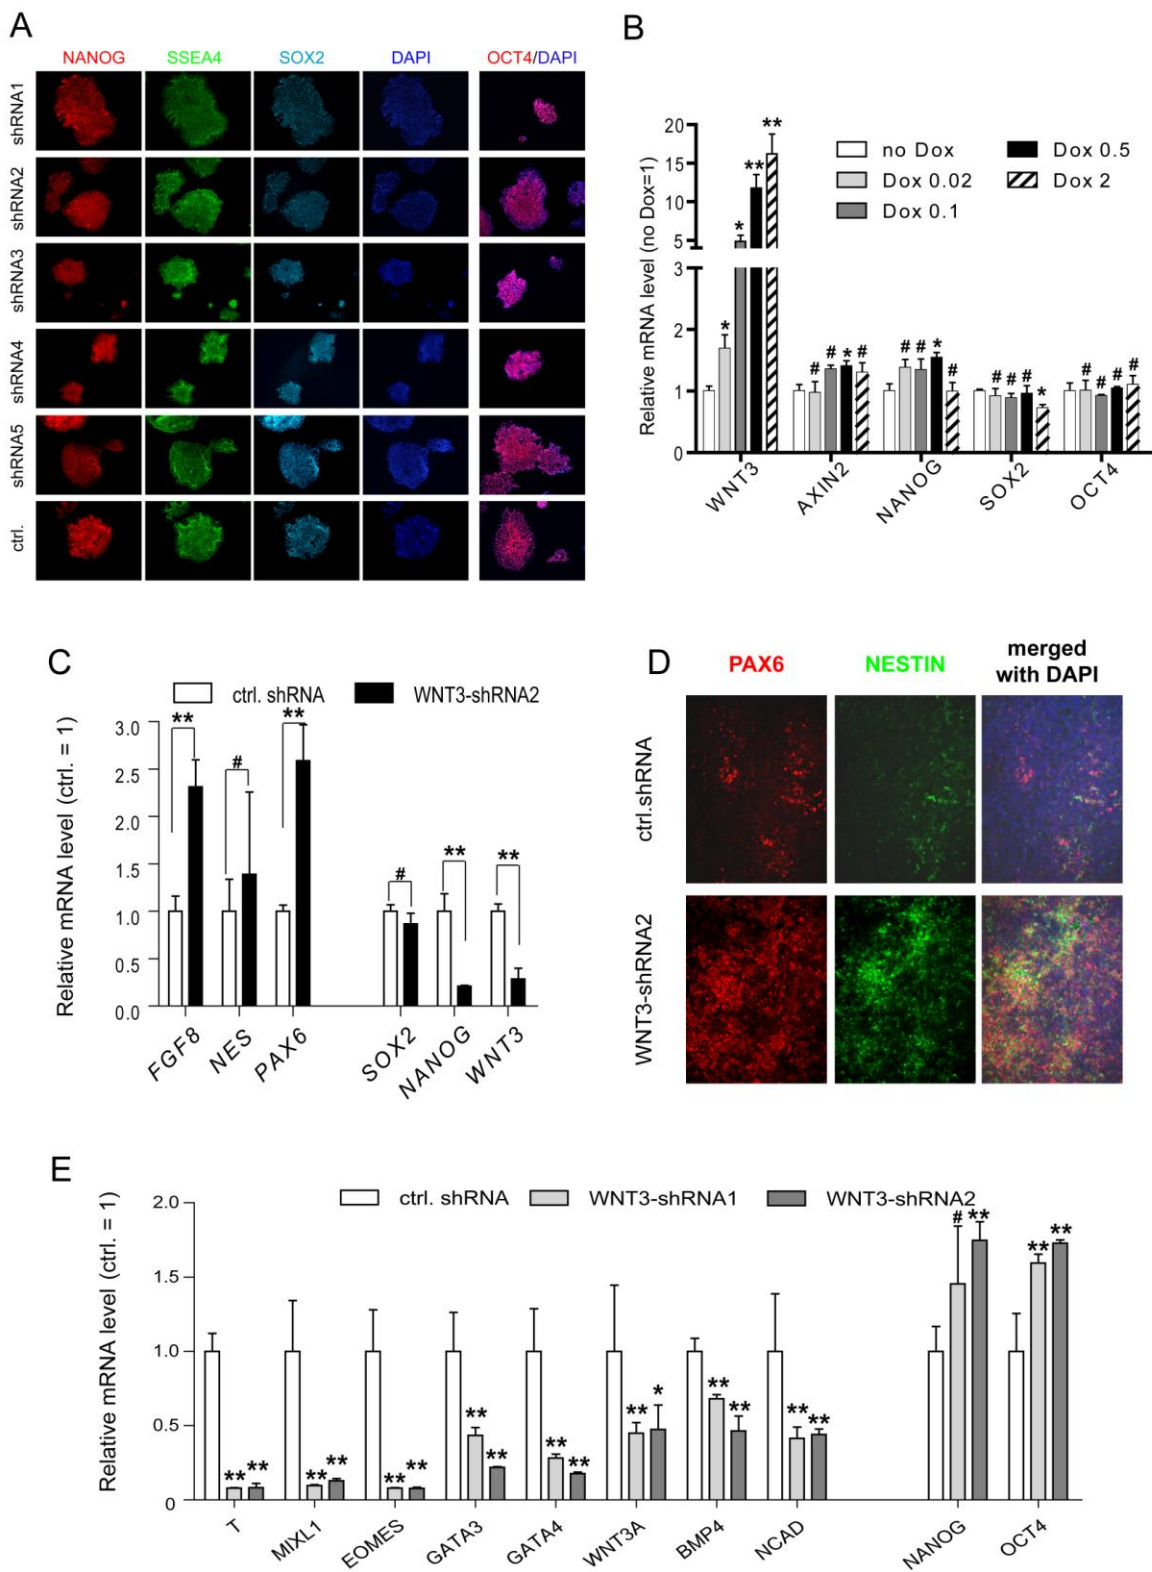

**Figure S2** (related to Figure 2). Change in WNT3 levels does not affect hESC maintenance, but affects neuroectoderm and mesendoderm differentiation

- (A) WNT3 knockdown in HUES8 does not affect hESC pluripotent gene protein expression (NANOG, SOX2, SSEA4 and OCT4) and colony morphology.
- (B) Dox-induced WNT3 expression in H9.2 does not affect expression of pluripotent factors or the canonical WNT signal marker, AXIN2. RT-qPCR analysis of *WNT3*, pluripotent factors (*NANOG*, *SOX2* and *OCT4*) and a canonical WNT signal marker *AXIN2* under different Dox concentration. The p value by student t test compared to no dox was shown as: #:  $p > 0.05$ ; \*:  $p < 0.05$ ; \*\*:  $p < 0.01$ .
- (C) After 5 days' neuroectoderm differentiation, WNT3-knockdown hESC HUES8 exhibited higher levels of neural and ectodermal marker gene expression (*PAX6*, *NESTIN*, *FGF8*) but with lower *NANOG* expression compared to control. The p value by student *t* test was shown as: #:  $p > 0.05$ ; \*:  $p < 0.05$ ; \*\*:  $p < 0.01$ .
- (D) After 11 days' neural differentiation, WNT3-knockdown HUES8 hESCs exhibited higher percentage of PAX6 and NESTIN positive cells compared to control.
- (E) After 1.5 days' mesendoderm differentiation, WNT3-knockdown HUES8 hESCs exhibited impaired activation of mesendoderm marker genes and maintained slightly higher expression of pluripotent markers when compared with the control hESCs. The p value by student *t* test compared to control shRNA was shown as: #:  $p > 0.05$ ; \*:  $p < 0.05$ ; \*\*:  $p < 0.01$ .

Data was shown by value with standard deviation from three biological replicates.

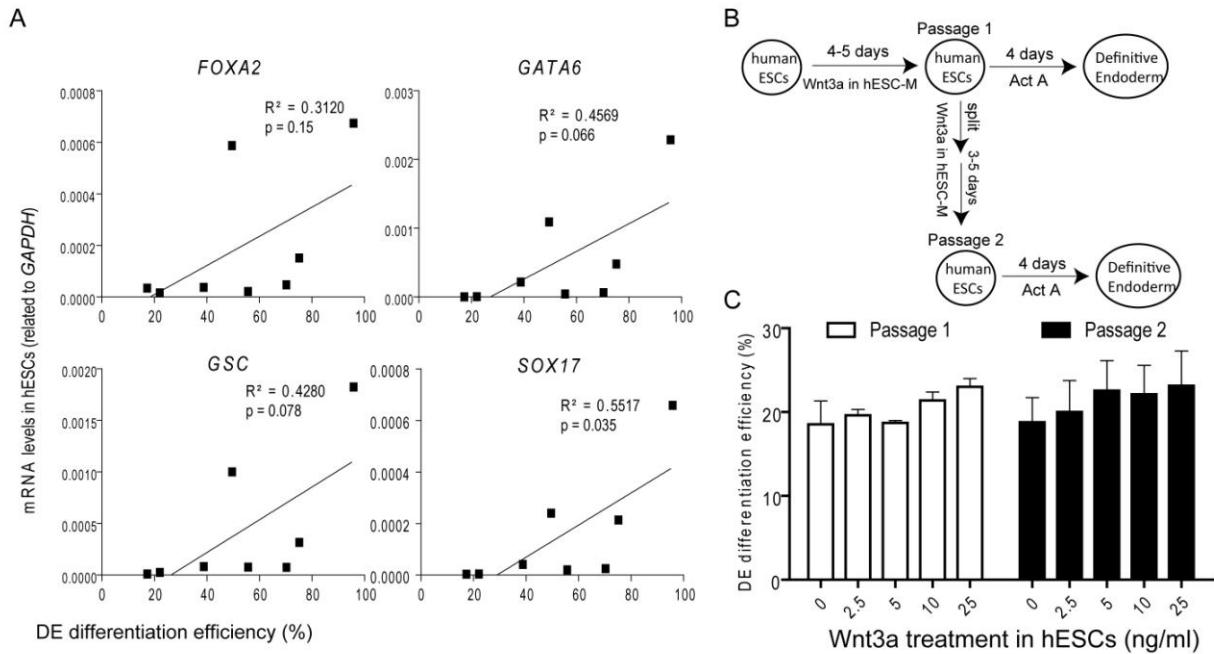

**Figure S3** (related to Figure 3).

- (A) Correlation between the gene expression levels of endoderm makers in hESCs and their definitive endoderm differentiation efficiency. The coefficient of determination  $R^2$  and the  $t$ -statistic values are shown.
- (B) Diagrammatic explanation of the experimental procedure. After culturing in regular hESC medium (hESC-M) supplemented with recombinant protein Wnt3a for either one or two passages, hESC line H9.2 was used to evaluate the definitive endoderm differentiation efficiency.
- (C) Treatment with various concentrations of exogenous Wnt3a protein failed to significantly alter the definitive endoderm differentiation capacity of H9.2 hESCs. Two passages of Wnt3a treatment were analyzed. Data was shown by value with standard deviation from two biological replicates.

**Table S1: Primers for quantitative expression analysis of RT-PCR.**

| <b>Genes</b>  | <b>Forward</b>           | <b>Reverse</b>           | <b>Product/bp</b> |
|---------------|--------------------------|--------------------------|-------------------|
| <i>GAPDH</i>  | AATGAAGGGGTCATTGATGG     | AAGGTGAAGGTCGGAGTCAA     | 108               |
| <i>WNT3</i>   | AGTTGCTTGGGGACCAGG       | CTCGCTGGCTACCCAATTT      | 110               |
| <i>WNT3</i>   | GAGCCCAGAGATGTGTACTGC    | CTTCTAATGGAGCCCCACCT     | 125               |
| <i>OCT4</i>   | CAAAGCAGAAACCCTCGTGC     | TCTCACTCGGTTCTCGATACTG   | 64                |
| <i>SOX2</i>   | GTCATTTGCTGTGGGTGATG     | AGAAAAACGAGGGAAATGGG     | 120               |
| <i>NANOG</i>  | CCCCAGCCTTTACTCTTCCTA    | CCAGGTTGAATTGTTCCAGGTC   | 97                |
| <i>NODAL</i>  | ATGCCAGATCCTCTTGTTGG     | AGACATCATCCGCAGCCTAC     | 104               |
| <i>WNT3A</i>  | CTTCTGCACATGAGCGTGTC     | AACTGCACCACCGTCCAC       | 133               |
| <i>WNT5A</i>  | GCATCCCAGCTCTGCCCAAC     | GCGCAGTGAACCGGAGCTGAA    | 74                |
| <i>BMP4</i>   | GCATTCGGTTACCAGGAATC     | TGAGCCTTTCCAGCAAGTTT     | 106               |
| <i>KDM6A</i>  | TACAGGCTCAGTTGTGTAACCT   | CTGCGGGAATTGGTAGGCTC     | 99                |
| <i>KDM6B</i>  | GGAGGCCACACGCTGCTAC      | GCCAGTATGAAAGTTCCAGAGCTG | 112               |
| <i>AXIN2</i>  | CTGGTGCAAAGACATAGCCA     | AGTGTGAGGTCCACGGAAC      | 103               |
| <i>DKK1</i>   | TTCCATTTTTGCAGTAATCC     | AGTACTGCGCTAGTCCCACC     | 126               |
| <i>NOGGIN</i> | CATGAAGCCTGGGTCTAGT      | TCGAACACCCAGACCCTATC     | 98                |
| <i>SOX17</i>  | GCATGACTCCGGTGTGAATCT    | TCACACGTCAGGATAGTTGCAGT  | 103               |
| <i>GATA6</i>  | ACTTGAGCTCGCTGTTCTCG     | CAGCAAAAATACTTCCCCCA     | 107               |
| <i>FOXA2</i>  | GGAGCAGCTACTATGCAGAGC    | CGTGTTTCATGCCGTTTCATCC   | 83                |
| <i>GSC</i>    | AGGAGAAAGTGGAGGTCTGGTTTA | GACGTCTTGTTCCACTTCTCCG   | 106               |
| <i>EOMES</i>  | CACATTGTAGTGGGCAGTGG     | CGCCACCAAAGTGGAGATGAT    | 102               |
| <i>CXCR4</i>  | TACACCGAGGAAATGGGCTCA    | AGATGATGGAGTAGATGGTGGG   | 112               |
| <i>MIXL1</i>  | GAGACTTGGCACGCCTGT       | GGTACCCCGACATCCACTT      | 99                |
| <i>PAX6</i>   | TCCGTTGGAAGTGGAGT        | GTTGGTATCCGGGACTTC       | 101               |
| <i>NES</i>    | GAGGGAAGTCTTGGAGCCAC     | AAGATGTCCCTCAGCCTGG      | 99                |
| <i>FGF8</i>   | CTCTGCTTCCAAAGGTGTCC     | CAGGTCCTGGCCAACAAG       | 94                |
| <i>GATA3</i>  | TTCTCCTCCAGAGTGTGGT      | AAAATGAACGGACAGAACCG     | 119               |
| <i>GATA4</i>  | CAGGCGTTGCACAGATAGTG     | CCCGACACCCCAATCTC        | 124               |
| <i>NCAD</i>   | GAGGAGTCAGTGAAGGAGTCA    | GGCAAGTTGATTGGAGGGATG    | 122               |

## **Supplemental Experimental Procedures**

### **Generation of WNT3 knockdown and overexpression cell lines**

The lentiviral vector system is obtained from the NIH AIDS Research and Reference Reagent Program. Five *WNT3* knockdown vectors were purchased from Open Biosystems (clone ID: TRCN0000033379 (C12), TRCN0000033380 (D1), TRCN0000033381 (D2), TRCN0000033382 (D3), and TRCN0000033383 (D4)). For knockdown, HUES8 was used as host. After lentiviral transfection, stable knock-down cells were selected by using 2 µg/ml puromycin based on the construct containing puromycin-resistant cassette. D2 and D3 show the best knockdown efficiency (more than 75%) and D4 show moderate knockdown efficiency (around 50%). For inducible overexpression, human *WNT3* was amplified from complementary DNA from human ESCs and cloned into a doxycyclin-inducible lentiviral vector pTYF-TRE followed by sequencing to confirm, as described previously (Liang et al., 2012). For overexpression assay, H9.2 was used based on the relatively low endogenous *WNT3* expression level.

### **Flow cytometry analysis**

Cells were dissociated to a single-cell suspension using 0.05% trypsin-EDTA or Accutase (StemCell Technologies). For labeling of cell surface antigens, cells were incubated with primary antibody (APC-conjugated mouse anti-human CD184 IgG, BD; PE-conjugated mouse anti-human CD117 IgG, BD) or control isotype in ice-cold FACS buffer (2% (vol/vol) FBS in PBS) for 30-45 minutes and washed twice. Then cell labeling was analyzed using the flow cytometer FACSAria II with FACSDiva software version 6.0 (BD Biosciences). All data presented in the manuscript was analyzed by FlowJo 7.6.1.

### **Neuroectoderm differentiation and mesendoderm differentiation**

Neuroectoderm differentiation was performed according to the dual inhibition protocol (Chambers et al., 2009) with minor modifications. Briefly, cultured HUES8 cells with 80% confluence were treated with 2µM SB431542 and 250ng/ml Noggin in KSR-Medium (human ES medium without bFGF) for five days and then RNA was extracted to examine neuroectoderm gene expression by quantitative RT-PCR. For PAX6 and NESTIN



immunostaining, another six days' treatment with 250ng/ml Noggin only in KSR-N2 medium (gradually increasing the ratio of N2 medium from 25% to 75%) was performed.

For mesendoderm differentiation, cultured HUES8 cells with 80% confluence were washed twice by DMEM/F12 followed by 1.5 days' treatment of 100 ng/ml activin A in DMEM/F12-N2B27 medium as the same as that used for definitive endoderm differentiation.

### **RNA Extraction and quantitative RT-PCR**

Total RNA was extracted from cell cultures using Qiashredder and RNeasy mini kits (Qiagen) and treated with RNase-free DNase I set according to the manufacturer's instructions. Total RNA (about 1-2  $\mu$ g per 20 $\mu$ l reaction) was reverse transcribed using SuperScript™ II Reverse Transcriptase (Invitrogen) primed with random hexamer oligonucleotides (Promega). Quantitative PCR was carried out on CFX384 Real-Time PCR system (Bio-Rad) using Sso-Fast EvaGreen Supermix (Bio-Rad) according to the manufacturer's instructions. Three technical replicates were performed for each sample/primer. Relative expression levels were normalized to *GAPDH* and calculated using the  $2^{-\Delta C_t}$  method. To confirm the correlation between *WNT3* expression level and endoderm differentiation efficiency, two pairs of *WNT3* primers were used. All primers were purchased from Invitrogen and listed in Table S1.

### **Immunofluorescence staining**

Culturing cells in chambered slides (Millipore) were fixed by 4% PFA for 15 minutes and blocked with 10% (vol/vol) donkey serum plus 0.2% Triton X-100 in PBS for 2 hours. Then samples were incubated at 4 °C for overnight with primary antibody or irrelevant IgG and then incubated at room temperature for 1 hour with appropriate secondary antibody (donkey anti-mouse IgG Alexa-488 or donkey anti-goat IgG Tritc or donkey anti-rabbit IgG Cy5) in blocking buffer. Cells were counterstained with 4'-6-diamidino-2-phenylindole (DAPI) for 5 min before mounting with Vectorshield (Vector Laboratories). The used primary antibodies and dilutions were listed as follows: Goat anti-human NANOG (R&D, 1:400), Rabbit anti-SOX2 (Millipore, 1:400), Mouse anti-human SSEA4 (Millipore, 1:200), Goat anti-human OCT4 (Santa Cruz, 1:400), Goat anti-human FOXA2 (R&D, 1:500), Goat anti-human SOX17 (R&D, 1:500), Rabbit anti-human PAX6 (Covance, 1:500), Mouse anti-NESTIN (R&D, 1:500).

**Supplementary references**

Chambers, S.M., Fasano, C.A., Papapetrou, E.P., Tomishima, M., Sadelain, M., and Studer, L. (2009). Highly efficient neural conversion of human ES and iPS cells by dual inhibition of SMAD signaling. *Nature biotechnology* *27*, 275-280.

Liang, G., He, J., and Zhang, Y. (2012). Kdm2b promotes induced pluripotent stem cell generation by facilitating gene activation early in reprogramming. *Nature cell biology* *14*, 457-466.
